# Supplementary material for: Plasmodium Rab5b is secreted to the cytoplasmic face of the tubovesicular network in infected red blood cells together with N-acylated adenylate kinase 2
Source: PubMed Central journal article supplement (PMC4912828; doi:10.1186/s12936-016-1377-4), 2016-06-17

**Figure S4**

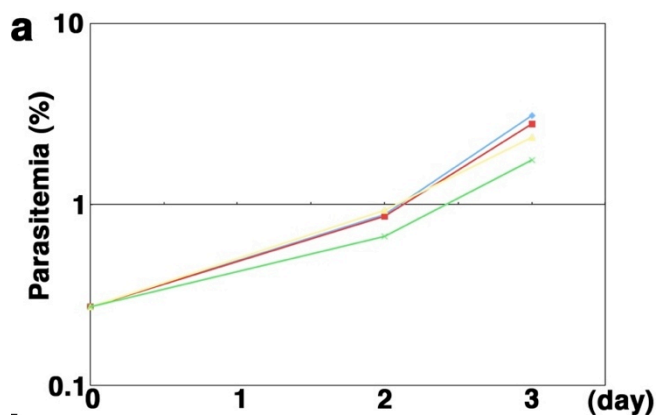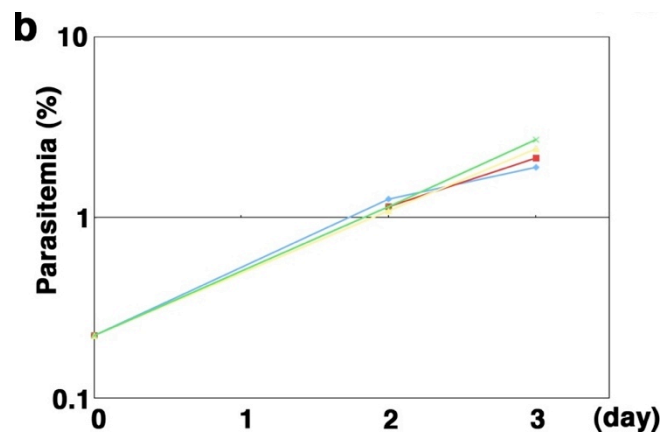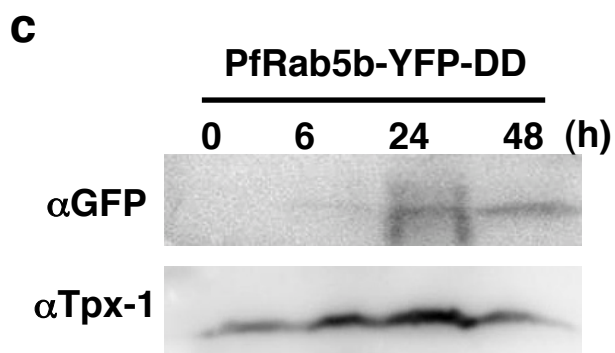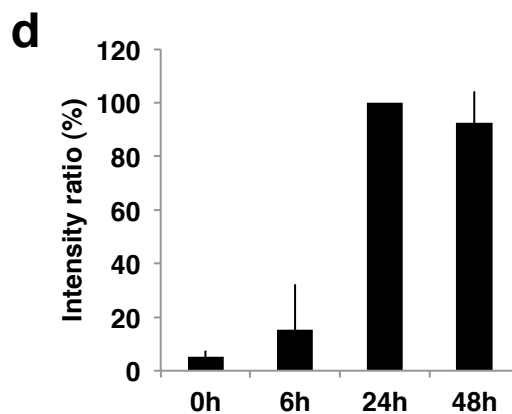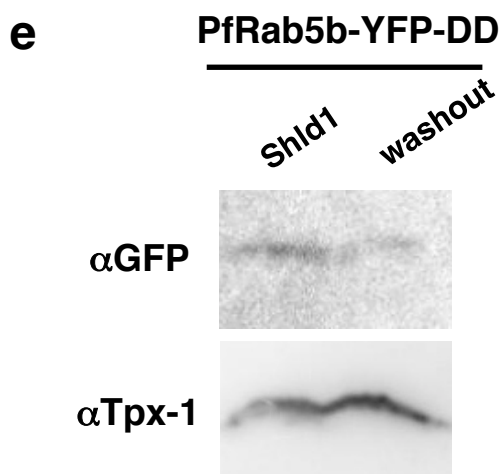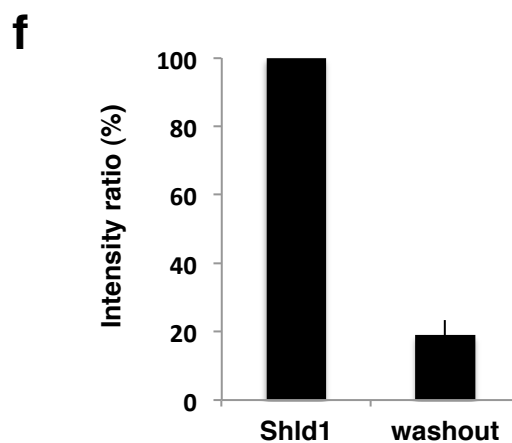

Supplement: 12936_2016_1377_MOESM5_ESM.pdf [file 12936_2016_1377_MOESM5_ESM.pdf]
