# Supplementary material for: Plasmodium Rab5b is secreted to the cytoplasmic face of the tubovesicular network in infected red blood cells together with N-acylated adenylate kinase 2
Source: Springer Nature journal article supplement (doi:10.1186/s12936-016-1377-4), 2016-06-17
Supplement: MOESM1 [file 10272172]

# Figure S1

**a**

**•PbRab5b-KO**

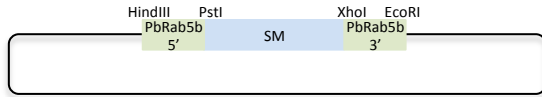

**•PbRab5b-mAG**

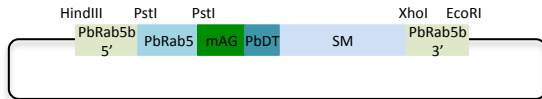

**•PbRab5 Chimeric**

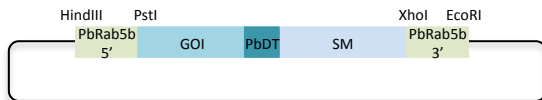

GOIs : PfRab5b, TgRab5b, PfRab5b-5a #1 - #4, PbRab5c, PbRab5b-5c

**•PbRab5b-mAG+RFP**

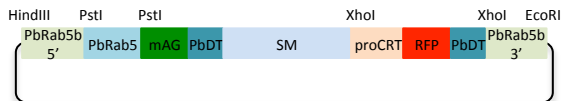

**•PbRab5b<sup>Q91L</sup>-mAG for single crossover**

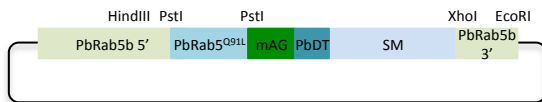

**b**

**•GOI-GFP-DD**

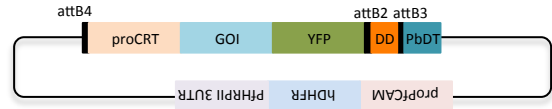

GOIs : PfRab5b, PfRaba5b<sup>Q94L</sup>, PfRaba5b<sup>G2A</sup>, PfRaba5b<sup>C3A</sup>, PfRab5b<sub>N20</sub>

**•RFP**

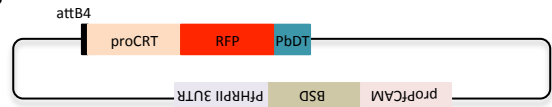

**•GOI-RFP**

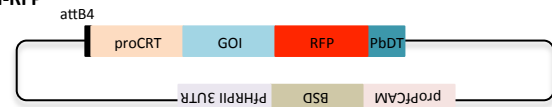

GOIs : PfAK2, PfSec13, PfVPS2, FabH(III)<sub>leader</sub>
