# Supplementary material for: Plasmodium Rab5b is secreted to the cytoplasmic face of the tubovesicular network in infected red blood cells together with N-acylated adenylate kinase 2
Source: Springer Nature journal article supplement (doi:10.1186/s12936-016-1377-4), 2016-06-17

Figure S3

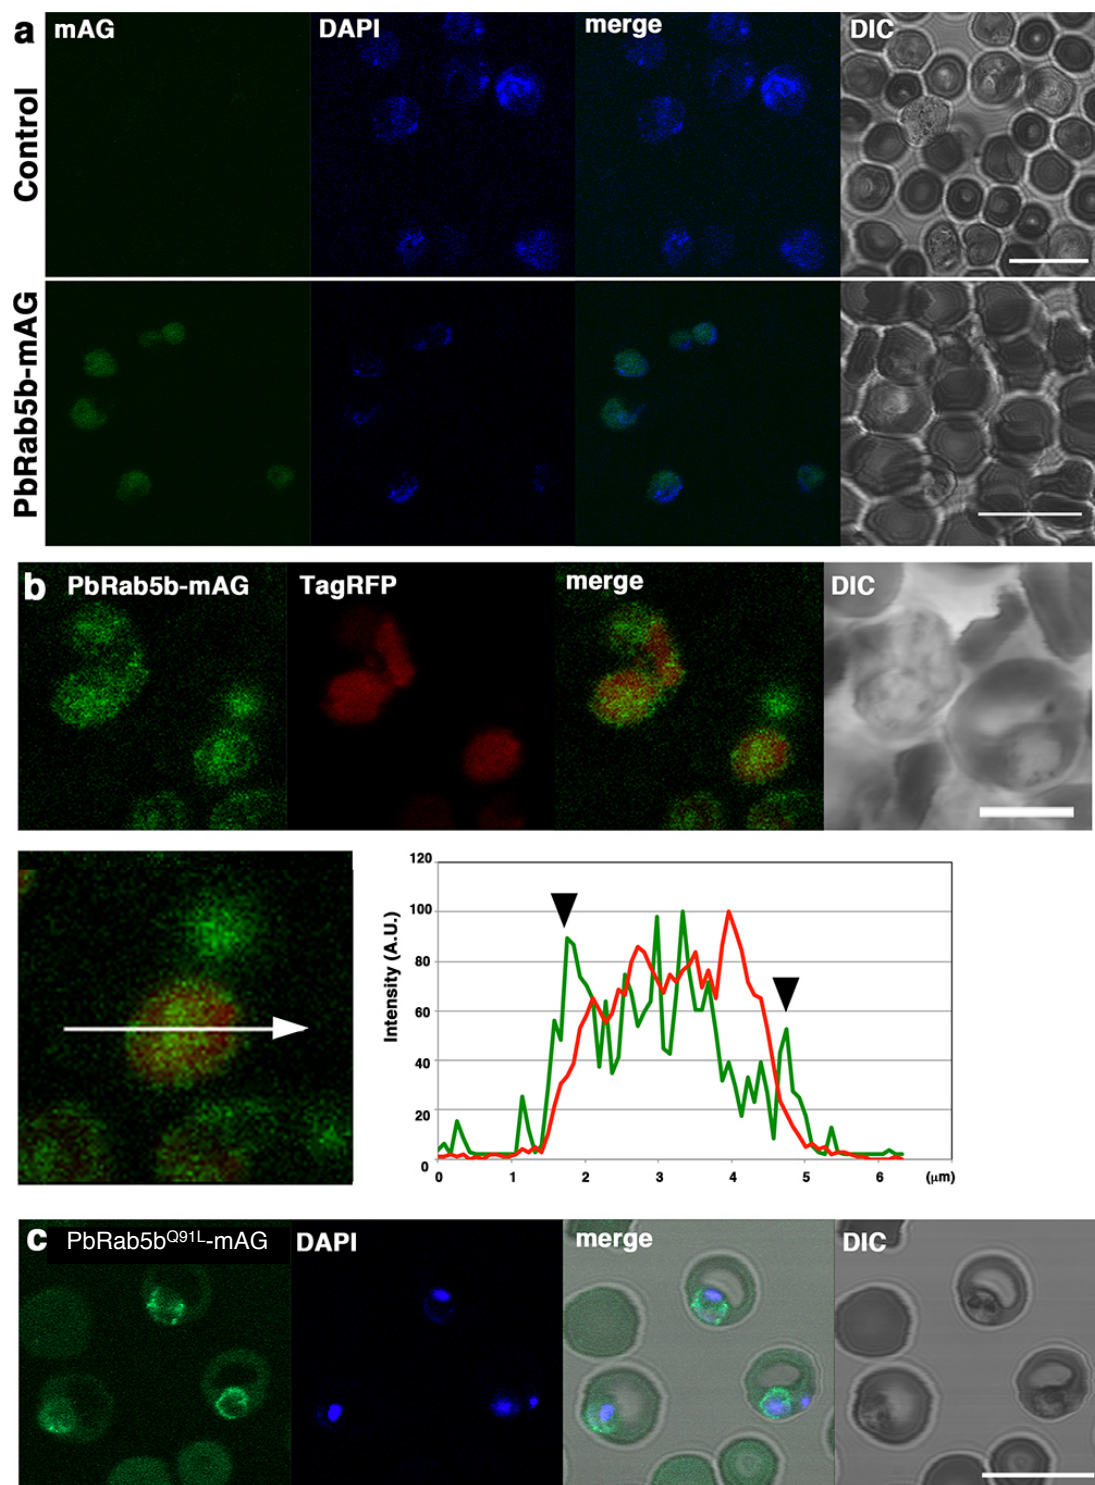

Supplement: MOESM4 [file 10272172]
