# Supplementary material for: Plasmodium Rab5b is secreted to the cytoplasmic face of the tubovesicular network in infected red blood cells together with N-acylated adenylate kinase 2
Source: Malar J. 2016 Jun 17;15:323. doi: 10.1186/s12936-016-1377-4 (PMC4912828; doi:10.1186/s12936-016-1377-4)
Supplement: Supplementary file 3 — 10.1186/s12936-016-1377-4 Multiple-alignment of amino acids sequences of Plasmodium Rab5b and Toxoplasma Rab5b. The GTP-binding box (red boxes) and the effector domain (light green box) are shown. Amino acids in the blue box indicate N-terminal myristoyl and palmitoyl modification sites. Toxoplasma gondii Rab5b possesses atypical insertion sequences at amino acid positions 165-182, which are not present in Plasmodium Rab5b. [file 12936_2016_1377_MOESM3_ESM.pdf]

Figure S2

**PbRab5b** MGCSSSTQRPQTTKNINVLTSGGGQK-----EDKKVKVLLGDSGVGKSSIALYLCHGRFSDSHQVTIGA AFLHHTIHLKN-GETMKLHIWDTGGQERFRAMAPLYYRDA 105  
**PfRab5b** MGCSSSTERLTSTKNINIVTSPAQQQKK---NAQDTKVKIVLLGDSGVGKSSIALYLCHGRFSEKHQVTIGA AFLHHNIELKN-GATMKLHIWDTGGQERFRSMAPLYYRDA 108  
**TgRab5b** MGCITASSTASAGESQLRMTNAGGSLDDGFSERLNLEAKIVLLGDSGVGKSSLALRFRCGRFPQYHEVTIGA AFLQQTIRVGDDGSLKLYIWDTGGQERFRAMAPLYYRDA 112  
\*\*\* :\*: :. :\*... : :\*:\*\*\*\*\*\*:\*\* :\*:\*\*:\* :\*\*\*\*\*: :\*. : \* :\*:\*\*\*\*\*:\*\*\*\*\*

**PbRab5b** YGAIVVYDSNNVDSFNSLKYWINEIKSSGPRNCCIMVVANKKD-LPQKINSE-----MVMKFCKEQHVSFIECSAKTGENIKTLFERLASHIYSRPF-- 196  
**PfRab5b** YGAVVVYDSNNVESFDSLKYWINEIKSNGPRNCCIMVVANKKD-LPQKLNSE-----MVMKFCEQENVSFIECSAKTGENITTLFEKLASRIYSRFKEV 201  
**TgRab5b** AGAVVVYDVTNPASMDAVRFWVEELKQRGPANCCIAVAANKSDSMENSENAEPPPEEGTAGVDVEAERRAEMKKYCAEGMLFVECSAKTGCNVGLLFEQLAKEVFEQLKQS 224  
\*:\*\*\* .\* \*: : : : :\*:\*. \*\* \*\* \*\* \*.\*\* : :. :\* :\*:\* : :\* :\*\*\*\*\* : :\*\*\*:\*. : : : :

**PbRab5b** ----- 196  
**PfRab5b** LYNNPZ 208  
**TgRab5b** MMEL--- 228
